# Supplementary material
Source: publisher figshare collection journal article supplement (https://acs.figshare.com/ndownloader/files/13372787)
Supplement: Supplementary file 1 [file 13372787]

## SUPPORTING INFORMATION

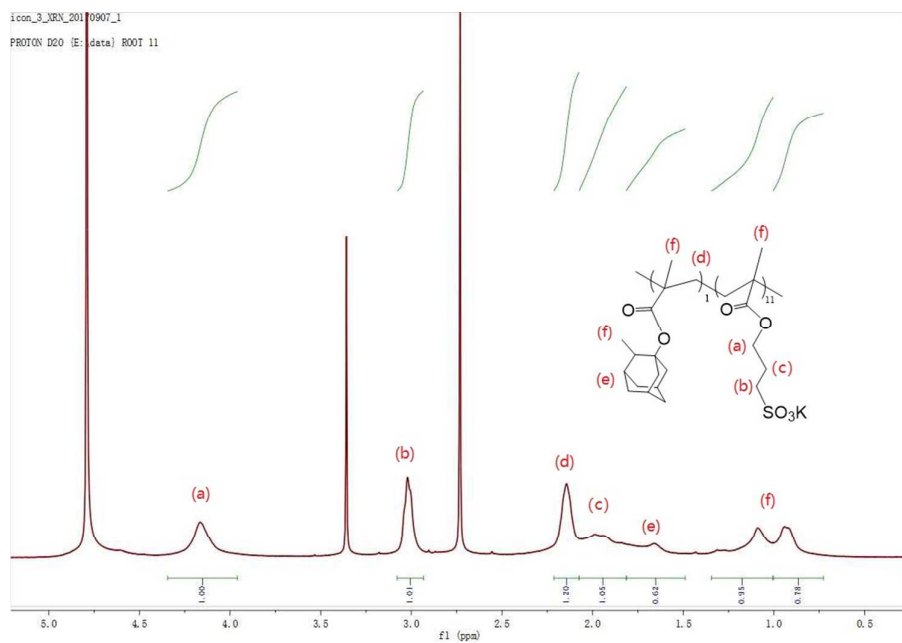

**Figure S1.** The chemical structure and  $^1\text{H}$ -NMR of pSPMA-AD

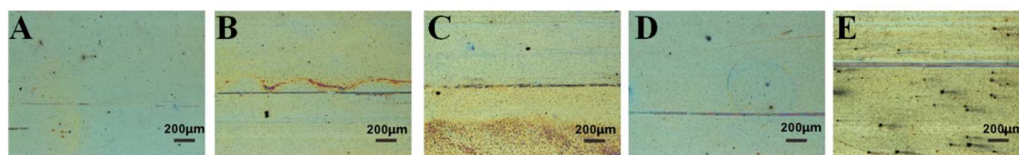

**Figure S2.** Optical microscope images of worn scars of silica wafers modified with ADA under different loads. (A) 0.2 N; (B) 0.4 N; (C) 0.7 N; (D) 1 N; (E) 1.5 N
